# Supplementary figures and images for: The Role of Robotic Visceral Surgery in Patients with Adhesions: A Systematic Review and Meta-Analysis
Source: MDPI journal article supplement (doi:10.3390/jpm12020307), 2022-02-18

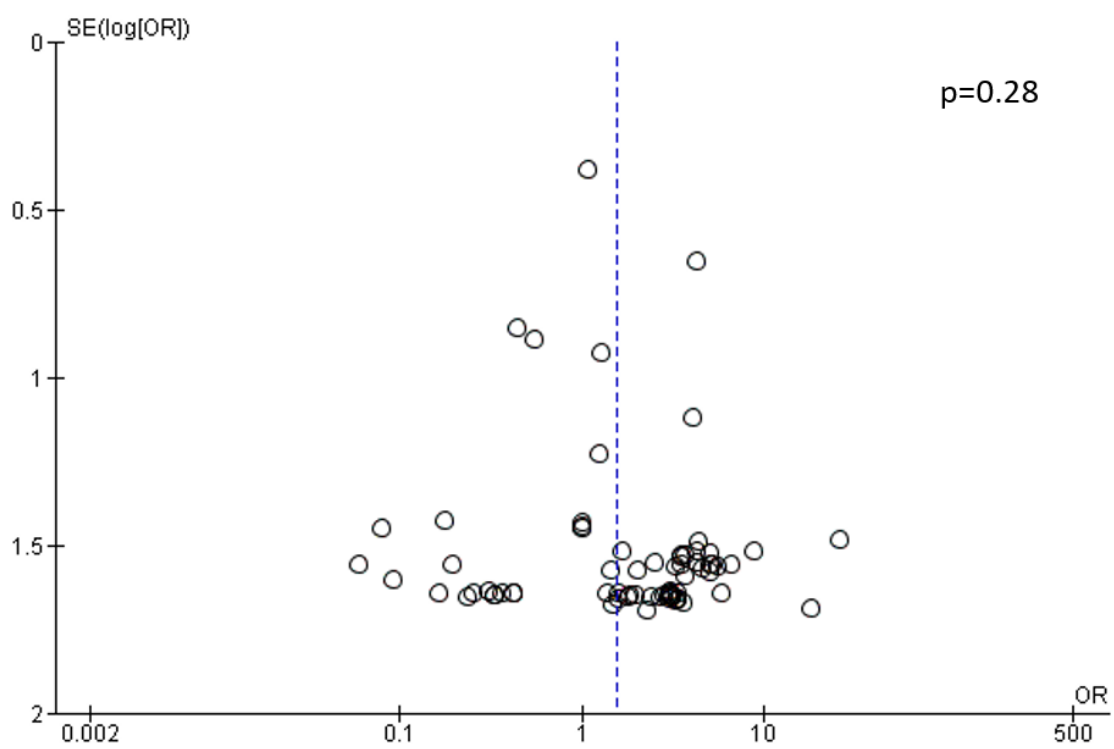

Figure S1. Forest plot analysis of the included studies.

Supplement: s1 [file s1]
